# Supplementary material for: Bayesian Group Index Regression for Modeling Chemical Mixtures and Cancer Risk
Source: PubMed Central journal article supplement (PMC8037139; doi:10.3390/ijerph18073486), 2021-03-27

## **Bayesian Group Index Regression for Modeling Chemical Mixtures and Cancer Risk**

David C. Wheeler<sup>a</sup>, Salem Rustom<sup>a</sup>, Matthew Carli<sup>a</sup>, Todd Whitehead<sup>b</sup>, Mary H. Ward<sup>c</sup>,  
Catherine Metayer<sup>b</sup>

<sup>a</sup>Department of Biostatistics, School of Medicine, Virginia Commonwealth University,  
Richmond, VA

<sup>b</sup>UC Berkeley School of Public Health, Berkeley, CA

<sup>c</sup>Occupational and Environmental Epidemiology Branch, Division of Cancer Epidemiology and  
Genetics, National Cancer Institute, Rockville, MD

Table S1: Individual scenarios in the scenarios sets of the simulation study

| No. | Set | No. chemicals in each group |         |         | No. important in each group |         |         | Association strength, OR |         |         | Sample size, N | Correlation structure, r        |
|-----|-----|-----------------------------|---------|---------|-----------------------------|---------|---------|--------------------------|---------|---------|----------------|---------------------------------|
|     |     | Group 1                     | Group 2 | Group 3 | Group 1                     | Group 2 | Group 3 | Group 1                  | Group 2 | Group 3 |                |                                 |
| 1   | A   | 5                           | 4       | 0       | 2                           | 2       | 0       | 1.00                     | 1.00    | -       | 1000           | 0.1 in group, 0.5 across groups |
| 2   | A   | 5                           | 4       | 0       | 2                           | 2       | 0       | 0.67                     | 1.50    | -       | 1000           | 0.1 in group, 0.5 across groups |
| 3   | A   | 5                           | 4       | 0       | 2                           | 2       | 0       | 0.50                     | 2.00    | -       | 1000           | 0.1 in group, 0.5 across groups |
| 4   | A   | 5                           | 4       | 0       | 2                           | 2       | 0       | 0.40                     | 2.50    | -       | 1000           | 0.1 in group, 0.5 across groups |
| 5   | A   | 5                           | 4       | 0       | 2                           | 2       | 0       | 0.33                     | 3.00    | -       | 1000           | 0.1 in group, 0.5 across groups |
| 6   | A   | 5                           | 4       | 0       | 2                           | 2       | 0       | 1.00                     | 1.00    | -       | 1000           | 0.3 in group, 0.7 across groups |
| 7   | A   | 5                           | 4       | 0       | 2                           | 2       | 0       | 0.67                     | 1.50    | -       | 1000           | 0.3 in group, 0.7 across groups |
| 8   | A   | 5                           | 4       | 0       | 2                           | 2       | 0       | 0.50                     | 2.00    | -       | 1000           | 0.3 in group, 0.7 across groups |
| 9   | A   | 5                           | 4       | 0       | 2                           | 2       | 0       | 0.40                     | 2.50    | -       | 1000           | 0.3 in group, 0.7 across groups |
| 10  | A   | 5                           | 4       | 0       | 2                           | 2       | 0       | 0.33                     | 3.00    | -       | 1000           | 0.3 in group, 0.7 across groups |
| 11  | A   | 5                           | 4       | 0       | 2                           | 2       | 0       | 1.00                     | 1.00    | -       | 1000           | 0.5 in group, 0.9 across groups |
| 12  | A   | 5                           | 4       | 0       | 2                           | 2       | 0       | 0.67                     | 1.50    | -       | 1000           | 0.5 in group, 0.9 across groups |
| 13  | A   | 5                           | 4       | 0       | 2                           | 2       | 0       | 0.50                     | 2.00    | -       | 1000           | 0.5 in group, 0.9 across groups |
| 14  | A   | 5                           | 4       | 0       | 2                           | 2       | 0       | 0.40                     | 2.50    | -       | 1000           | 0.5 in group, 0.9 across groups |
| 15  | A   | 5                           | 4       | 0       | 2                           | 2       | 0       | 0.33                     | 3.00    | -       | 1000           | 0.5 in group, 0.9 across groups |
| 16  | B   | 5                           | 4       | 5       | 1                           | 1       | 1       | 1.00                     | 1.00    | 1.00    | 1000           | 0.1 in group, 0.5 across groups |
| 17  | B   | 5                           | 4       | 5       | 1                           | 1       | 1       | 0.67                     | 1.50    | 1.50    | 1000           | 0.1 in group, 0.5 across groups |
| 18  | B   | 5                           | 4       | 5       | 1                           | 1       | 1       | 0.50                     | 2.00    | 2.00    | 1000           | 0.1 in group, 0.5 across groups |
| 19  | B   | 5                           | 4       | 5       | 1                           | 1       | 1       | 0.40                     | 2.50    | 2.50    | 1000           | 0.1 in group, 0.5 across groups |
| 20  | B   | 5                           | 4       | 5       | 1                           | 1       | 1       | 0.33                     | 3.00    | 3.00    | 1000           | 0.1 in group, 0.5 across groups |
| 21  | B   | 5                           | 4       | 5       | 1                           | 1       | 1       | 1.00                     | 1.00    | 1.00    | 1000           | 0.3 in group, 0.7 across groups |
| 22  | B   | 5                           | 4       | 5       | 1                           | 1       | 1       | 0.67                     | 1.50    | 1.50    | 1000           | 0.3 in group, 0.7 across groups |
| 23  | B   | 5                           | 4       | 5       | 1                           | 1       | 1       | 0.50                     | 2.00    | 2.00    | 1000           | 0.3 in group, 0.7 across groups |
| 24  | B   | 5                           | 4       | 5       | 1                           | 1       | 1       | 0.40                     | 2.50    | 2.50    | 1000           | 0.3 in group, 0.7 across groups |
| 25  | B   | 5                           | 4       | 5       | 1                           | 1       | 1       | 0.33                     | 3.00    | 3.00    | 1000           | 0.3 in group, 0.7 across groups |
| 26  | B   | 5                           | 4       | 5       | 1                           | 1       | 1       | 1.00                     | 1.00    | 1.00    | 1000           | 0.5 in group, 0.9 across groups |
| 27  | B   | 5                           | 4       | 5       | 1                           | 1       | 1       | 0.67                     | 1.50    | 1.50    | 1000           | 0.5 in group, 0.9 across groups |
| 28  | B   | 5                           | 4       | 5       | 1                           | 1       | 1       | 0.50                     | 2.00    | 2.00    | 1000           | 0.5 in group, 0.9 across groups |
| 29  | B   | 5                           | 4       | 5       | 1                           | 1       | 1       | 0.40                     | 2.50    | 2.50    | 1000           | 0.5 in group, 0.9 across groups |
| 30  | B   | 5                           | 4       | 5       | 1                           | 1       | 1       | 0.33                     | 3.00    | 3.00    | 1000           | 0.5 in group, 0.9 across groups |
| 31  | C   | 5                           | 4       | 5       | 3                           | 2       | 3       | 1.00                     | 1.00    | 1.00    | 1000           | 0.1 in group, 0.5 across groups |
| 32  | C   | 5                           | 4       | 5       | 3                           | 2       | 3       | 0.67                     | 1.50    | 1.50    | 1000           | 0.1 in group, 0.5 across groups |
| 33  | C   | 5                           | 4       | 5       | 3                           | 2       | 3       | 0.50                     | 2.00    | 2.00    | 1000           | 0.1 in group, 0.5 across groups |
| 34  | C   | 5                           | 4       | 5       | 3                           | 2       | 3       | 0.40                     | 2.50    | 2.50    | 1000           | 0.1 in group, 0.5 across groups |
| 35  | C   | 5                           | 4       | 5       | 3                           | 2       | 3       | 0.33                     | 3.00    | 3.00    | 1000           | 0.1 in group, 0.5 across groups |
| 36  | C   | 5                           | 4       | 5       | 3                           | 2       | 3       | 1.00                     | 1.00    | 1.00    | 1000           | 0.3 in group, 0.7 across groups |
| 37  | C   | 5                           | 4       | 5       | 3                           | 2       | 3       | 0.67                     | 1.50    | 1.50    | 1000           | 0.3 in group, 0.7 across groups |
| 38  | C   | 5                           | 4       | 5       | 3                           | 2       | 3       | 0.50                     | 2.00    | 2.00    | 1000           | 0.3 in group, 0.7 across groups |
| 39  | C   | 5                           | 4       | 5       | 3                           | 2       | 3       | 0.40                     | 2.50    | 2.50    | 1000           | 0.3 in group, 0.7 across groups |
| 40  | C   | 5                           | 4       | 5       | 3                           | 2       | 3       | 0.33                     | 3.00    | 3.00    | 1000           | 0.3 in group, 0.7 across groups |
| 41  | C   | 5                           | 4       | 5       | 3                           | 2       | 3       | 1.00                     | 1.00    | 1.00    | 1000           | 0.5 in group, 0.9 across groups |
| 42  | C   | 5                           | 4       | 5       | 3                           | 2       | 3       | 0.67                     | 1.50    | 1.50    | 1000           | 0.5 in group, 0.9 across groups |
| 43  | C   | 5                           | 4       | 5       | 3                           | 2       | 3       | 0.50                     | 2.00    | 2.00    | 1000           | 0.5 in group, 0.9 across groups |
| 44  | C   | 5                           | 4       | 5       | 3                           | 2       | 3       | 0.40                     | 2.50    | 2.50    | 1000           | 0.5 in group, 0.9 across groups |
| 45  | C   | 5                           | 4       | 5       | 3                           | 2       | 3       | 0.33                     | 3.00    | 3.00    | 1000           | 0.5 in group, 0.9 across groups |
| 46  | D   | 5                           | 4       | 5       | 3                           | 2       | 3       | 1.00                     | 1.00    | 1.00    | 500            | 0.1 in group, 0.5 across groups |
| 47  | D   | 5                           | 4       | 5       | 3                           | 2       | 3       | 0.67                     | 1.50    | 1.50    | 500            | 0.1 in group, 0.5 across groups |
| 48  | D   | 5                           | 4       | 5       | 3                           | 2       | 3       | 0.50                     | 2.00    | 2.00    | 500            | 0.1 in group, 0.5 across groups |
| 49  | D   | 5                           | 4       | 5       | 3                           | 2       | 3       | 0.40                     | 2.50    | 2.50    | 500            | 0.1 in group, 0.5 across groups |
| 50  | D   | 5                           | 4       | 5       | 3                           | 2       | 3       | 0.33                     | 3.00    | 3.00    | 500            | 0.1 in group, 0.5 across groups |
| 51  | D   | 5                           | 4       | 5       | 3                           | 2       | 3       | 1.00                     | 1.00    | 1.00    | 500            | 0.3 in group, 0.7 across groups |
| 52  | D   | 5                           | 4       | 5       | 3                           | 2       | 3       | 0.67                     | 1.50    | 1.50    | 500            | 0.3 in group, 0.7 across groups |
| 53  | D   | 5                           | 4       | 5       | 3                           | 2       | 3       | 0.50                     | 2.00    | 2.00    | 500            | 0.3 in group, 0.7 across groups |
| 54  | D   | 5                           | 4       | 5       | 3                           | 2       | 3       | 0.40                     | 2.50    | 2.50    | 500            | 0.3 in group, 0.7 across groups |
| 55  | D   | 5                           | 4       | 5       | 3                           | 2       | 3       | 0.33                     | 3.00    | 3.00    | 500            | 0.3 in group, 0.7 across groups |
| 56  | D   | 5                           | 4       | 5       | 3                           | 2       | 3       | 1.00                     | 1.00    | 1.00    | 500            | 0.5 in group, 0.9 across groups |
| 57  | D   | 5                           | 4       | 5       | 3                           | 2       | 3       | 0.67                     | 1.50    | 1.50    | 500            | 0.5 in group, 0.9 across groups |
| 58  | D   | 5                           | 4       | 5       | 3                           | 2       | 3       | 0.50                     | 2.00    | 2.00    | 500            | 0.5 in group, 0.9 across groups |
| 59  | D   | 5                           | 4       | 5       | 3                           | 2       | 3       | 0.40                     | 2.50    | 2.50    | 500            | 0.5 in group, 0.9 across groups |
| 60  | D   | 5                           | 4       | 5       | 3                           | 2       | 3       | 0.33                     | 3.00    | 3.00    | 500            | 0.5 in group, 0.9 across groups |

Table S2: List of chemicals and their group used in the CCLS analysis

| <b>Chemical</b>    | <b>Chemical Group</b> |
|--------------------|-----------------------|
| PCB-118            | PCB                   |
| PCB-138            | PCB                   |
| PCB-153            | PCB                   |
| PCB-180            | PCB                   |
| DDE                | Insecticide           |
| DDT                | Insecticide           |
| Cyfluthrin(I)      | Insecticide           |
| Cyfluthrin(II)     | Insecticide           |
| Cyfluthrin(III)    | Insecticide           |
| Cyfluthrin(IV)     | Insecticide           |
| Carbaryl           | Insecticide           |
| Propoxur           | Insecticide           |
| Pentachlorophenol  | Insecticide           |
| gamma-Chlordane    | Insecticide           |
| alpha-Chlordane    | Insecticide           |
| Chlorpyrifos       | Insecticide           |
| Diazinon           | Insecticide           |
| Phosmet            | Insecticide           |
| cis-Permethrin     | Insecticide           |
| Methoxychlor       | Insecticide           |
| Cypermethrin(I)    | Insecticide           |
| Cypermethrin(II)   | Insecticide           |
| Cypermethrin(III)  | Insecticide           |
| Cypermethrin(IV)   | Insecticide           |
| trans-Permethrin   | Insecticide           |
| Piperonyl butoxide | Insecticide           |
| o-Phenylphenol     | Herbicide             |
| Trifluralin        | Herbicide             |
| Simazine           | Herbicide             |
| mCPP               | Herbicide             |
| Dicamba            | Herbicide             |
| Dacthal            | Herbicide             |
| 2,4-D              | Herbicide             |
| As                 | Metals                |
| Cr                 | Metals                |
| Cu                 | Metals                |
| Pb                 | Metals                |
| Sn                 | Metals                |
| W                  | Metals                |
| Zn                 | Metals                |

|                         |         |
|-------------------------|---------|
| Indeno(1,2,3-c,d)pyrene | PAH     |
| Dibenz(ah)anthracene    | PAH     |
| Dibenzo(ae)pyrene       | PAH     |
| Coronene                | PAH     |
| Benzo(a)anthracene      | PAH     |
| Benzo(a)pyrene          | PAH     |
| Benzo(b)fluoranthene    | PAH     |
| Nicotine                | Tobacco |
| Cotinine                | Tobacco |

Table S3: Estimated odds ratio (OR) (averaged over 100 replicates) and power from the Bayesian group index model and group weighted quantile sum (GWQS) for Scenario A

| Parameter              | Bayesian Group Index |       | GWQS         |       |
|------------------------|----------------------|-------|--------------|-------|
|                        | Estimated OR         | Power | Estimated OR | Power |
| Weak Correlation       |                      |       |              |       |
| exp( $\beta_1$ )= 1.00 | 1.0057               | 0.01  | 1.0194       | 0.02  |
| exp( $\beta_2$ )= 1.00 | 1.0032               | 0.03  | 1.0169       | 0.09  |
| exp( $\beta_1$ )= 0.67 | 0.6546               | 0.99  | 0.6654       | 0.92  |
| exp( $\beta_2$ )= 1.50 | 1.5458               | 1.00  | 1.5449       | 1.00  |
| exp( $\beta_1$ )= 0.50 | 0.4794               | 1.00  | 0.4972       | 1.00  |
| exp( $\beta_2$ )= 2.00 | 2.0883               | 1.00  | 2.0218       | 1.00  |
| exp( $\beta_1$ )= 0.40 | 0.3795               | 1.00  | 0.3996       | 1.00  |
| exp( $\beta_2$ )= 2.50 | 2.6347               | 1.00  | 2.5182       | 1.00  |
| exp( $\beta_1$ )= 0.33 | 0.3148               | 1.00  | 0.3326       | 1.00  |
| exp( $\beta_2$ )= 3.00 | 3.1550               | 1.00  | 3.0067       | 1.00  |
| Moderate Correlation   |                      |       |              |       |
| exp( $\beta_1$ )= 1.00 | 1.0086               | 0.03  | 1.0107       | 0.06  |
| exp( $\beta_2$ )= 1.00 | 1.0026               | 0.02  | 0.9981       | 0.07  |
| exp( $\beta_1$ )= 0.67 | 0.6664               | 1.00  | 0.6799       | 0.98  |
| exp( $\beta_2$ )= 1.50 | 1.5158               | 1.00  | 1.4668       | 0.97  |
| exp( $\beta_1$ )= 0.50 | 0.4965               | 1.00  | 0.5160       | 1.00  |
| exp( $\beta_2$ )= 2.00 | 2.0446               | 1.00  | 1.9785       | 1.00  |
| exp( $\beta_1$ )= 0.40 | 0.3925               | 1.00  | 0.4113       | 1.00  |
| exp( $\beta_2$ )= 2.50 | 2.5963               | 1.00  | 2.4797       | 1.00  |
| exp( $\beta_1$ )= 0.33 | 0.3189               | 1.00  | 0.3356       | 1.00  |
| exp( $\beta_2$ )= 3.00 | 3.1939               | 1.00  | 3.0480       | 1.00  |
| Strong Correlation     |                      |       |              |       |
| exp( $\beta_1$ )= 1.00 | 1.0096               | 0.07  | 1.0171       | 0.04  |
| exp( $\beta_2$ )= 1.00 | 0.9967               | 0.04  | 0.9949       | 0.06  |
| exp( $\beta_1$ )= 0.67 | 0.6659               | 1.00  | 0.6755       | 0.99  |
| exp( $\beta_2$ )= 1.50 | 1.5154               | 1.00  | 1.4848       | 1.00  |
| exp( $\beta_1$ )= 0.50 | 0.5024               | 1.00  | 0.5101       | 1.00  |
| exp( $\beta_2$ )= 2.00 | 1.9955               | 1.00  | 1.9624       | 1.00  |
| exp( $\beta_1$ )= 0.40 | 0.4002               | 1.00  | 0.4173       | 1.00  |
| exp( $\beta_2$ )= 2.50 | 2.5067               | 1.00  | 2.4172       | 1.00  |
| exp( $\beta_1$ )= 0.33 | 0.3278               | 1.00  | 0.3389       | 1.00  |
| exp( $\beta_2$ )= 3.00 | 3.0642               | 1.00  | 2.9603       | 1.00  |

Table S4: Estimated odds ratio (OR) (averaged over 100 replicates) and power from the Bayesian group index model and group weighted quantile sum (GWQS) for Scenario B

| Parameter              | Bayesian Group Index |       | GWQS         |       |
|------------------------|----------------------|-------|--------------|-------|
|                        | Estimated OR         | Power | Estimated OR | Power |
| Weak Correlation       |                      |       |              |       |
| exp( $\beta_1$ )= 1.00 | 0.9957               | 0.05  | 1.0106       | 0.07  |
| exp( $\beta_2$ )= 1.00 | 0.9989               | 0.05  | 0.9855       | 0.04  |
| exp( $\beta_3$ )= 1.00 | 1.0087               | 0.04  | 1.0169       | 0.04  |
| exp( $\beta_1$ )= 0.67 | 0.6813               | 0.99  | 0.7133       | 0.81  |
| exp( $\beta_2$ )= 1.50 | 1.5179               | 1.00  | 1.4876       | 0.94  |
| exp( $\beta_3$ )= 1.50 | 1.5018               | 1.00  | 1.4580       | 0.89  |
| exp( $\beta_1$ )= 0.50 | 0.4970               | 1.00  | 0.5278       | 0.99  |
| exp( $\beta_2$ )= 2.00 | 2.0648               | 1.00  | 2.0169       | 1.00  |
| exp( $\beta_3$ )= 2.00 | 2.0358               | 1.00  | 1.9995       | 1.00  |
| exp( $\beta_1$ )= 0.40 | 0.3896               | 1.00  | 0.4212       | 1.00  |
| exp( $\beta_2$ )= 2.50 | 2.6110               | 1.00  | 2.5161       | 1.00  |
| exp( $\beta_3$ )= 2.50 | 2.5708               | 1.00  | 2.4726       | 1.00  |
| exp( $\beta_1$ )= 0.33 | 0.3274               | 1.00  | 0.3518       | 1.00  |
| exp( $\beta_2$ )= 3.00 | 3.1119               | 1.00  | 3.0181       | 1.00  |
| exp( $\beta_3$ )= 3.00 | 3.0886               | 1.00  | 2.8874       | 1.00  |
| Moderate Correlation   |                      |       |              |       |
| exp( $\beta_1$ )= 1.00 | 0.9938               | 0.04  | 1.0048       | 0.04  |
| exp( $\beta_2$ )= 1.00 | 1.0001               | 0.01  | 1.0031       | 0.04  |
| exp( $\beta_3$ )= 1.00 | 1.0038               | 0.04  | 1.0133       | 0.04  |
| exp( $\beta_1$ )= 0.67 | 0.6760               | 1.00  | 0.7035       | 0.91  |
| exp( $\beta_2$ )= 1.50 | 1.5068               | 1.00  | 1.4700       | 0.98  |
| exp( $\beta_3$ )= 1.50 | 1.4938               | 1.00  | 1.4794       | 0.96  |
| exp( $\beta_1$ )= 0.50 | 0.5063               | 1.00  | 0.5346       | 1.00  |
| exp( $\beta_2$ )= 2.00 | 1.9934               | 1.00  | 1.9282       | 1.00  |
| exp( $\beta_3$ )= 2.00 | 2.0129               | 1.00  | 1.9933       | 1.00  |
| exp( $\beta_1$ )= 0.40 | 0.4053               | 1.00  | 0.4260       | 1.00  |
| exp( $\beta_2$ )= 2.50 | 2.5456               | 1.00  | 2.4817       | 1.00  |
| exp( $\beta_3$ )= 2.50 | 2.5307               | 1.00  | 2.4693       | 1.00  |
| exp( $\beta_1$ )= 0.33 | 0.3359               | 1.00  | 0.3609       | 1.00  |
| exp( $\beta_2$ )= 3.00 | 3.0217               | 1.00  | 2.9188       | 1.00  |
| exp( $\beta_3$ )= 3.00 | 3.0009               | 1.00  | 2.8864       | 1.00  |
| Strong Correlation     |                      |       |              |       |
| exp( $\beta_1$ )= 1.00 | 0.9968               | 0.07  | 1.0071       | 0.09  |
| exp( $\beta_2$ )= 1.00 | 1.0047               | 0.03  | 1.0007       | 0.04  |
| exp( $\beta_3$ )= 1.00 | 1.0011               | 0.03  | 1.0030       | 0.04  |
| exp( $\beta_1$ )= 0.67 | 0.6716               | 1.00  | 0.6891       | 0.91  |
| exp( $\beta_2$ )= 1.50 | 1.4989               | 1.00  | 1.4658       | 0.96  |
| exp( $\beta_3$ )= 1.50 | 1.5049               | 1.00  | 1.4920       | 0.95  |
| exp( $\beta_1$ )= 0.50 | 0.5046               | 1.00  | 0.5295       | 1.00  |
| exp( $\beta_2$ )= 2.00 | 2.0131               | 1.00  | 1.9769       | 1.00  |
| exp( $\beta_3$ )= 2.00 | 1.9934               | 1.00  | 1.9303       | 1.00  |
| exp( $\beta_1$ )= 0.40 | 0.4041               | 1.00  | 0.4278       | 1.00  |

|                        |        |      |        |      |
|------------------------|--------|------|--------|------|
| exp( $\beta_2$ )= 2.50 | 2.5071 | 1.00 | 2.4496 | 1.00 |
| exp( $\beta_3$ )= 2.50 | 2.4974 | 1.00 | 2.4257 | 1.00 |
| exp( $\beta_1$ )= 0.33 | 0.3392 | 1.00 | 0.3634 | 1.00 |
| exp( $\beta_2$ )= 3.00 | 3.0142 | 1.00 | 2.9282 | 1.00 |
| exp( $\beta_3$ )= 3.00 | 2.9794 | 1.00 | 2.8888 | 1.00 |

Table S5: Estimated odds ratio (OR) and power values for the Bayesian group index model and group weighted quantile sum (GWQS) regression for Scenario C

| Parameter              | Bayesian Group Index |       | GWQS         |       |
|------------------------|----------------------|-------|--------------|-------|
|                        | Estimated OR         | Power | Estimated OR | Power |
| Weak Correlation       |                      |       |              |       |
| exp( $\beta_1$ )= 1.00 | 0.9957               | 0.05  | 1.0106       | 0.07  |
| exp( $\beta_2$ )= 1.00 | 0.9989               | 0.05  | 0.9855       | 0.04  |
| exp( $\beta_3$ )= 1.00 | 1.0087               | 0.04  | 1.0169       | 0.04  |
| exp( $\beta_1$ )= 0.67 | 0.6189               | 1.00  | 0.6286       | 0.98  |
| exp( $\beta_2$ )= 1.50 | 1.5803               | 1.00  | 1.5599       | 0.96  |
| exp( $\beta_3$ )= 1.50 | 1.6205               | 1.00  | 1.6251       | 1.00  |
| exp( $\beta_1$ )= 0.50 | 0.4521               | 1.00  | 0.4609       | 1.00  |
| exp( $\beta_2$ )= 2.00 | 2.1360               | 1.00  | 2.1173       | 1.00  |
| exp( $\beta_3$ )= 2.00 | 2.1724               | 1.00  | 2.1751       | 1.00  |
| exp( $\beta_1$ )= 0.40 | 0.3599               | 1.00  | 0.3712       | 1.00  |
| exp( $\beta_2$ )= 2.50 | 2.6983               | 1.00  | 2.6758       | 1.00  |
| exp( $\beta_3$ )= 2.50 | 2.7867               | 1.00  | 2.7812       | 1.00  |
| exp( $\beta_1$ )= 0.33 | 0.2950               | 1.00  | 0.3110       | 1.00  |
| exp( $\beta_2$ )= 3.00 | 3.2694               | 1.00  | 3.1715       | 1.00  |
| exp( $\beta_3$ )= 3.00 | 3.3399               | 1.00  | 3.3223       | 1.00  |
| Moderate Correlation   |                      |       |              |       |
| exp( $\beta_1$ )= 1.00 | 0.9938               | 0.04  | 1.0048       | 0.04  |
| exp( $\beta_2$ )= 1.00 | 1.0001               | 0.01  | 1.0031       | 0.04  |
| exp( $\beta_3$ )= 1.00 | 1.0038               | 0.04  | 1.0133       | 0.04  |
| exp( $\beta_1$ )= 0.67 | 0.6388               | 1.00  | 0.6536       | 1.00  |
| exp( $\beta_2$ )= 1.50 | 1.5411               | 1.00  | 1.5267       | 0.99  |
| exp( $\beta_3$ )= 1.50 | 1.5644               | 1.00  | 1.5383       | 1.00  |
| exp( $\beta_1$ )= 0.50 | 0.4681               | 1.00  | 0.4797       | 1.00  |
| exp( $\beta_2$ )= 2.00 | 2.0944               | 1.00  | 2.0665       | 1.00  |
| exp( $\beta_3$ )= 2.00 | 2.1067               | 1.00  | 2.0759       | 1.00  |
| exp( $\beta_1$ )= 0.40 | 0.3757               | 1.00  | 0.3928       | 1.00  |
| exp( $\beta_2$ )= 2.50 | 2.6020               | 1.00  | 2.5400       | 1.00  |
| exp( $\beta_3$ )= 2.50 | 2.6310               | 1.00  | 2.5671       | 1.00  |
| exp( $\beta_1$ )= 0.33 | 0.3077               | 1.00  | 0.3216       | 1.00  |
| exp( $\beta_2$ )= 3.00 | 3.2028               | 1.00  | 3.0951       | 1.00  |
| exp( $\beta_3$ )= 3.00 | 3.2282               | 1.00  | 3.1515       | 1.00  |
| Strong Correlation     |                      |       |              |       |
| exp( $\beta_1$ )= 1.00 | 0.9968               | 0.07  | 0.9985       | 0.03  |
| exp( $\beta_2$ )= 1.00 | 1.0047               | 0.03  | 1.0092       | 0.06  |
| exp( $\beta_3$ )= 1.00 | 1.0011               | 0.03  | 0.9992       | 0.05  |

|                        |        |      |        |      |
|------------------------|--------|------|--------|------|
| exp( $\beta_1$ )= 0.67 | 0.6525 | 1.00 | 0.6736 | 0.95 |
| exp( $\beta_2$ )= 1.50 | 1.5276 | 1.00 | 1.5026 | 0.96 |
| exp( $\beta_3$ )= 1.50 | 1.5277 | 1.00 | 1.5119 | 0.98 |
| exp( $\beta_1$ )= 0.50 | 0.4833 | 1.00 | 0.4966 | 1.00 |
| exp( $\beta_2$ )= 2.00 | 2.0311 | 1.00 | 2.0098 | 1.00 |
| exp( $\beta_3$ )= 2.00 | 2.0567 | 1.00 | 2.0219 | 1.00 |
| exp( $\beta_1$ )= 0.40 | 0.3836 | 1.00 | 0.4066 | 1.00 |
| exp( $\beta_2$ )= 2.50 | 2.5435 | 1.00 | 2.4508 | 1.00 |
| exp( $\beta_3$ )= 2.50 | 2.5808 | 1.00 | 2.5250 | 1.00 |
| exp( $\beta_1$ )= 0.33 | 0.3188 | 1.00 | 0.3475 | 1.00 |
| exp( $\beta_2$ )= 3.00 | 3.0729 | 1.00 | 2.9347 | 1.00 |
| exp( $\beta_3$ )= 3.00 | 3.0978 | 1.00 | 2.9785 | 1.00 |



Table S6: MSE and for the Bayesian group index model and group weighted quantile sum (GWQS) for Scenario A

| Parameter              | Bayesian Group Index |         | GWQS   |         |
|------------------------|----------------------|---------|--------|---------|
|                        | MSE                  | Bias    | MSE    | Bias    |
| Weak Correlation       |                      |         |        |         |
| exp( $\beta_1$ )= 1.00 | 0.0049               | 0.0032  | 0.0122 | 0.0132  |
| exp( $\beta_2$ )= 1.00 | 0.0055               | 0.0004  | 0.0185 | 0.0075  |
| exp( $\beta_1$ )= 0.67 | 0.0094               | -0.0229 | 0.0164 | -0.0101 |
| exp( $\beta_2$ )= 1.50 | 0.0075               | 0.0267  | 0.0131 | 0.0228  |
| exp( $\beta_1$ )= 0.50 | 0.0098               | -0.0460 | 0.0205 | -0.0155 |
| exp( $\beta_2$ )= 2.00 | 0.0092               | 0.0394  | 0.0157 | 0.0029  |
| exp( $\beta_1$ )= 0.40 | 0.0121               | -0.0570 | 0.0220 | -0.0118 |
| exp( $\beta_2$ )= 2.50 | 0.0108               | 0.0482  | 0.0202 | -0.0030 |
| exp( $\beta_1$ )= 0.33 | 0.0169               | -0.0636 | 0.0239 | -0.0140 |
| exp( $\beta_2$ )= 3.00 | 0.0115               | 0.0456  | 0.0198 | -0.0078 |
| Moderate Correlation   |                      |         |        |         |
| exp( $\beta_1$ )= 1.00 | 0.0046               | 0.0062  | 0.0101 | 0.0055  |
| exp( $\beta_2$ )= 1.00 | 0.0050               | 0.0001  | 0.0117 | -0.0077 |
| exp( $\beta_1$ )= 0.67 | 0.0055               | -0.0031 | 0.0114 | 0.0140  |
| exp( $\beta_2$ )= 1.50 | 0.0058               | 0.0076  | 0.0117 | -0.0278 |
| exp( $\beta_1$ )= 0.50 | 0.0080               | -0.0109 | 0.0161 | 0.0238  |
| exp( $\beta_2$ )= 2.00 | 0.0074               | 0.0186  | 0.0128 | -0.0171 |
| exp( $\beta_1$ )= 0.40 | 0.0094               | -0.0235 | 0.0153 | 0.0206  |
| exp( $\beta_2$ )= 2.50 | 0.0097               | 0.0335  | 0.0163 | -0.0162 |
| exp( $\beta_1$ )= 0.33 | 0.0113               | -0.0486 | 0.0192 | -0.0027 |
| exp( $\beta_2$ )= 3.00 | 0.0127               | 0.0580  | 0.0199 | 0.0060  |
| Strong Correlation     |                      |         |        |         |
| exp( $\beta_1$ )= 1.00 | 0.0047               | 0.0072  | 0.0101 | 0.0119  |
| exp( $\beta_2$ )= 1.00 | 0.0040               | -0.0053 | 0.0097 | -0.0099 |
| exp( $\beta_1$ )= 0.67 | 0.0062               | -0.0043 | 0.0100 | 0.0082  |
| exp( $\beta_2$ )= 1.50 | 0.0055               | 0.0075  | 0.0077 | -0.0140 |
| exp( $\beta_1$ )= 0.50 | 0.0064               | 0.0015  | 0.0135 | 0.0132  |
| exp( $\beta_2$ )= 2.00 | 0.0065               | -0.0055 | 0.0145 | -0.0259 |
| exp( $\beta_1$ )= 0.40 | 0.0076               | -0.0033 | 0.0179 | 0.0340  |
| exp( $\beta_2$ )= 2.50 | 0.0071               | -0.0009 | 0.0158 | -0.0408 |
| exp( $\beta_1$ )= 0.33 | 0.0087               | -0.0208 | 0.0176 | 0.0077  |
| exp( $\beta_2$ )= 3.00 | 0.0103               | 0.0161  | 0.0202 | -0.0233 |

Table S7: MSE and Bias for the Bayesian group index model and group weighted quantile sum (GWQS) for Scenario B

| Parameter              | Bayesian Group Index |         | GWQS   |         |
|------------------------|----------------------|---------|--------|---------|
|                        | MSE                  | Bias    | MSE    | Bias    |
| Weak Correlation       |                      |         |        |         |
| exp( $\beta_1$ )= 1.00 | 0.0075               | -0.0081 | 0.0162 | 0.0024  |
| exp( $\beta_2$ )= 1.00 | 0.0056               | -0.0039 | 0.0131 | -0.0210 |
| exp( $\beta_3$ )= 1.00 | 0.0074               | 0.0049  | 0.0151 | 0.0093  |
| exp( $\beta_1$ )= 0.67 | 0.0072               | 0.0183  | 0.0173 | 0.0608  |
| exp( $\beta_2$ )= 1.50 | 0.0079               | 0.0079  | 0.0138 | -0.0151 |
| exp( $\beta_3$ )= 1.50 | 0.0077               | -0.0026 | 0.0138 | -0.0347 |
| exp( $\beta_1$ )= 0.50 | 0.0106               | -0.0113 | 0.0238 | 0.0431  |
| exp( $\beta_2$ )= 2.00 | 0.0113               | 0.0266  | 0.0160 | 0.0002  |
| exp( $\beta_3$ )= 2.00 | 0.0107               | 0.0125  | 0.0169 | -0.0088 |
| exp( $\beta_1$ )= 0.40 | 0.0120               | -0.0319 | 0.0217 | 0.0418  |
| exp( $\beta_2$ )= 2.50 | 0.0098               | 0.0393  | 0.0205 | -0.0038 |
| exp( $\beta_3$ )= 2.50 | 0.0129               | 0.0216  | 0.0228 | -0.0223 |
| exp( $\beta_1$ )= 0.33 | 0.0148               | -0.0249 | 0.0243 | 0.0425  |
| exp( $\beta_2$ )= 3.00 | 0.0118               | 0.0312  | 0.0276 | -0.0078 |
| exp( $\beta_3$ )= 3.00 | 0.0133               | 0.0227  | 0.0290 | -0.0514 |
| Moderate Correlation   |                      |         |        |         |
| exp( $\beta_1$ )= 1.00 | 0.0049               | -0.0086 | 0.0115 | -0.0010 |
| exp( $\beta_2$ )= 1.00 | 0.0040               | -0.0020 | 0.0101 | -0.0019 |
| exp( $\beta_3$ )= 1.00 | 0.0045               | 0.0015  | 0.0101 | 0.0081  |
| exp( $\beta_1$ )= 0.67 | 0.0058               | 0.0111  | 0.0148 | 0.0475  |
| exp( $\beta_2$ )= 1.50 | 0.0064               | 0.0013  | 0.0124 | -0.0263 |
| exp( $\beta_3$ )= 1.50 | 0.0050               | -0.0066 | 0.0112 | -0.0193 |
| exp( $\beta_1$ )= 0.50 | 0.0073               | 0.0090  | 0.0191 | 0.0588  |
| exp( $\beta_2$ )= 2.00 | 0.0068               | -0.0067 | 0.0121 | -0.0417 |
| exp( $\beta_3$ )= 2.00 | 0.0070               | 0.0029  | 0.0146 | -0.0105 |
| exp( $\beta_1$ )= 0.40 | 0.0111               | 0.0077  | 0.0246 | 0.0522  |
| exp( $\beta_2$ )= 2.50 | 0.0077               | 0.0143  | 0.0129 | -0.0137 |
| exp( $\beta_3$ )= 2.50 | 0.0112               | 0.0066  | 0.0236 | -0.0240 |
| exp( $\beta_1$ )= 0.33 | 0.0107               | 0.0025  | 0.0320 | 0.0660  |
| exp( $\beta_2$ )= 3.00 | 0.0098               | 0.0023  | 0.0207 | -0.0374 |
| exp( $\beta_3$ )= 3.00 | 0.0109               | -0.0053 | 0.0239 | -0.0496 |
| Strong Correlation     |                      |         |        |         |
| exp( $\beta_1$ )= 1.00 | 0.0062               | -0.0063 | 0.0148 | -0.0004 |
| exp( $\beta_2$ )= 1.00 | 0.0040               | 0.0026  | 0.0098 | -0.0041 |
| exp( $\beta_3$ )= 1.00 | 0.0047               | -0.0013 | 0.0098 | -0.0020 |
| exp( $\beta_1$ )= 0.67 | 0.0062               | 0.0043  | 0.0144 | 0.0262  |
| exp( $\beta_2$ )= 1.50 | 0.0056               | -0.0035 | 0.0112 | -0.0282 |
| exp( $\beta_3$ )= 1.50 | 0.0058               | 0.0004  | 0.0115 | -0.0110 |
| exp( $\beta_1$ )= 0.50 | 0.0065               | 0.0060  | 0.0156 | 0.0510  |
| exp( $\beta_2$ )= 2.00 | 0.0070               | 0.0030  | 0.0149 | -0.0189 |
| exp( $\beta_3$ )= 2.00 | 0.0061               | -0.0063 | 0.0130 | -0.0411 |
| exp( $\beta_1$ )= 0.40 | 0.0090               | 0.0057  | 0.0207 | 0.0585  |

|                        |        |         |        |         |
|------------------------|--------|---------|--------|---------|
| exp( $\beta_2$ )= 2.50 | 0.0082 | -0.0013 | 0.0156 | -0.0278 |
| exp( $\beta_3$ )= 2.50 | 0.0072 | -0.0047 | 0.0157 | -0.0374 |
| exp( $\beta_1$ )= 0.33 | 0.0103 | 0.0123  | 0.0259 | 0.0765  |
| exp( $\beta_2$ )= 3.00 | 0.0100 | -0.0003 | 0.0201 | -0.0337 |
| exp( $\beta_3$ )= 3.00 | 0.0076 | -0.0107 | 0.0159 | -0.0448 |

Table S8: MSE and bias for effect estimates from the Bayesian group index model and group weighted quantile sum (GWQS) regression for Scenario C

| Parameter                   | Bayesian Group Index |         | GWQS   |         |
|-----------------------------|----------------------|---------|--------|---------|
|                             | MSE                  | Bias    | MSE    | Bias    |
| <b>Weak Correlation</b>     |                      |         |        |         |
| exp( $\beta_1$ )= 1.00      | 0.0075               | -0.0081 | 0.0162 | 0.0024  |
| exp( $\beta_2$ )= 1.00      | 0.0056               | -0.0039 | 0.0131 | -0.0210 |
| exp( $\beta_3$ )= 1.00      | 0.0074               | 0.0049  | 0.0151 | 0.0093  |
| exp( $\beta_1$ )= 0.67      | 0.0110               | -0.0769 | 0.0183 | -0.0658 |
| exp( $\beta_2$ )= 1.50      | 0.0078               | 0.0494  | 0.0145 | 0.0324  |
| exp( $\beta_3$ )= 1.50      | 0.0106               | 0.0748  | 0.0182 | 0.0736  |
| exp( $\beta_1$ )= 0.50      | 0.0176               | -0.1041 | 0.0233 | -0.0891 |
| exp( $\beta_2$ )= 2.00      | 0.0093               | 0.0631  | 0.0141 | 0.0512  |
| exp( $\beta_3$ )= 2.00      | 0.0118               | 0.0800  | 0.0180 | 0.0779  |
| exp( $\beta_1$ )= 0.40      | 0.0202               | -0.1097 | 0.0275 | -0.0845 |
| exp( $\beta_2$ )= 2.50      | 0.0122               | 0.0728  | 0.0234 | 0.0577  |
| exp( $\beta_3$ )= 2.50      | 0.0191               | 0.1044  | 0.0252 | 0.0988  |
| exp( $\beta_1$ )= 0.33      | 0.0225               | -0.1255 | 0.0241 | -0.0781 |
| exp( $\beta_2$ )= 3.00      | 0.0152               | 0.0817  | 0.0219 | 0.0455  |
| exp( $\beta_3$ )= 3.00      | 0.0200               | 0.1025  | 0.0237 | 0.0946  |
| <b>Moderate Correlation</b> |                      |         |        |         |
| exp( $\beta_1$ )= 1.00      | 0.0049               | -0.0086 | 0.0115 | -0.0010 |
| exp( $\beta_2$ )= 1.00      | 0.0040               | -0.0020 | 0.0101 | -0.0019 |
| exp( $\beta_3$ )= 1.00      | 0.0045               | 0.0015  | 0.0101 | 0.0081  |
| exp( $\beta_1$ )= 0.67      | 0.0069               | -0.0451 | 0.0111 | -0.0250 |
| exp( $\beta_2$ )= 1.50      | 0.0054               | 0.0246  | 0.0112 | 0.0121  |
| exp( $\beta_3$ )= 1.50      | 0.0062               | 0.0397  | 0.0089 | 0.0209  |
| exp( $\beta_1$ )= 0.50      | 0.0104               | -0.0688 | 0.0149 | -0.0478 |
| exp( $\beta_2$ )= 2.00      | 0.0088               | 0.0427  | 0.0133 | 0.0264  |
| exp( $\beta_3$ )= 2.00      | 0.0073               | 0.0495  | 0.0137 | 0.0309  |
| exp( $\beta_1$ )= 0.40      | 0.0134               | -0.0670 | 0.0211 | -0.0285 |
| exp( $\beta_2$ )= 2.50      | 0.0078               | 0.0367  | 0.0139 | 0.0089  |
| exp( $\beta_3$ )= 2.50      | 0.0092               | 0.0476  | 0.0147 | 0.0193  |
| exp( $\beta_1$ )= 0.33      | 0.0209               | -0.0868 | 0.0267 | -0.0480 |
| exp( $\beta_2$ )= 3.00      | 0.0127               | 0.0609  | 0.0167 | 0.0230  |
| exp( $\beta_3$ )= 3.00      | 0.0132               | 0.0690  | 0.0187 | 0.0407  |
| <b>Strong Correlation</b>   |                      |         |        |         |
| exp( $\beta_1$ )= 1.00      | 0.0062               | -0.0063 | 0.0106 | -0.0067 |

|                                                                            |                            |                             |                            |                              |
|----------------------------------------------------------------------------|----------------------------|-----------------------------|----------------------------|------------------------------|
| exp( $\beta_2$ )= 1.00<br>exp( $\beta_3$ )= 1.00                           | 0.0040<br>0.0047           | 0.0026<br>-0.0013           | 0.0109<br>0.0111           | 0.0037<br>-0.0063            |
| exp( $\beta_1$ )= 0.67<br>exp( $\beta_2$ )= 1.50<br>exp( $\beta_3$ )= 1.50 | 0.0051<br>0.0078<br>0.0055 | -0.0237<br>0.0145<br>0.0157 | 0.0085<br>0.0128<br>0.0095 | 0.0061<br>-0.0047<br>0.0032  |
| exp( $\beta_1$ )= 0.50<br>exp( $\beta_2$ )= 2.00<br>exp( $\beta_3$ )= 2.00 | 0.0079<br>0.0079<br>0.0085 | -0.0373<br>0.0115<br>0.0239 | 0.0135<br>0.0151<br>0.0152 | -0.0134<br>-0.0026<br>0.0031 |
| exp( $\beta_1$ )= 0.40<br>exp( $\beta_2$ )= 2.50<br>exp( $\beta_3$ )= 2.50 | 0.0106<br>0.0080<br>0.0083 | -0.0462<br>0.0134<br>0.0280 | 0.0207<br>0.0170<br>0.0139 | 0.0060<br>-0.0279<br>0.0029  |
| exp( $\beta_1$ )= 0.33<br>exp( $\beta_2$ )= 3.00<br>exp( $\beta_3$ )= 3.00 | 0.0132<br>0.0100<br>0.0103 | -0.0500<br>0.0192<br>0.0272 | 0.0243<br>0.0217<br>0.0185 | 0.0300<br>-0.0323<br>-0.0165 |

Table S9: Sensitivity and specificity for the Bayesian group index model and group weighted quantile sum (GWQS) regression for simulation scenarios A-C

| Effect Size | Correlation | Bayesian Group Index |             | GWQS        |             |
|-------------|-------------|----------------------|-------------|-------------|-------------|
|             |             | Sensitivity          | Specificity | Sensitivity | Specificity |
| Scenario A  |             |                      |             |             |             |
| OR = 1.00   | Weak        | 0.400                | 0.606       | 0.385       | 0.602       |
|             | Moderate    | 0.413                | 0.562       | 0.408       | 0.606       |
|             | Strong      | 0.430                | 0.532       | 0.390       | 0.624       |
| OR = 1.50   | Weak        | 0.893                | 0.968       | 0.848       | 0.898       |
|             | Moderate    | 0.768                | 0.944       | 0.708       | 0.846       |
|             | Strong      | 0.673                | 0.858       | 0.608       | 0.748       |
| OR = 2.00   | Weak        | 0.985                | 0.992       | 0.960       | 0.964       |
|             | Moderate    | 0.908                | 0.980       | 0.850       | 0.902       |
|             | Strong      | 0.788                | 0.936       | 0.748       | 0.802       |
| OR = 2.50   | Weak        | 1.000                | 1.000       | 0.993       | 0.998       |
|             | Moderate    | 0.968                | 0.988       | 0.930       | 0.960       |
|             | Strong      | 0.860                | 0.968       | 0.813       | 0.896       |
| OR = 3.00   | Weak        | 1.000                | 0.998       | 0.995       | 0.998       |
|             | Moderate    | 0.990                | 1.000       | 0.963       | 0.978       |
|             | Strong      | 0.933                | 0.984       | 0.860       | 0.908       |
| Scenario B  |             |                      |             |             |             |
| OR = 1.00   | Weak        | 0.376                | 0.615       | 0.401       | 0.635       |
|             | Moderate    | 0.424                | 0.592       | 0.416       | 0.632       |
|             | Strong      | 0.413                | 0.565       | 0.386       | 0.613       |
| OR = 1.50   | Weak        | 0.713                | 0.953       | 0.688       | 0.883       |
|             | Moderate    | 0.625                | 0.910       | 0.605       | 0.825       |
|             | Strong      | 0.553                | 0.835       | 0.535       | 0.752       |
| OR = 2.00   | Weak        | 0.858                | 0.985       | 0.810       | 0.947       |
|             | Moderate    | 0.773                | 0.967       | 0.740       | 0.918       |
|             | Strong      | 0.651                | 0.897       | 0.613       | 0.820       |

|            |             |             |             |             |             |
|------------|-------------|-------------|-------------|-------------|-------------|
| OR = 2.50  | Weak        | 0.919       | 1.000       | 0.873       | 0.987       |
|            | Moderate    | 0.819       | 0.980       | 0.774       | 0.953       |
|            | Strong      | 0.710       | 0.950       | 0.665       | 0.880       |
| OR = 3.00  | Weak        | 0.969       | 1.000       | 0.908       | 0.988       |
|            | Moderate    | 0.849       | 0.988       | 0.821       | 0.965       |
|            | Strong      | 0.735       | 0.962       | 0.706       | 0.892       |
| Scenario C | Correlation | Sensitivity | Specificity | Sensitivity | Specificity |
| OR = 1.00  | Weak        | 0.393       | 0.624       | 0.443       | 0.630       |
|            | Moderate    | 0.443       | 0.590       | 0.433       | 0.615       |
|            | Strong      | 0.440       | 0.583       | 0.410       | 0.598       |
| OR = 1.50  | Weak        | 1.000       | 0.994       | 1.000       | 0.935       |
|            | Moderate    | 0.993       | 0.981       | 0.993       | 0.874       |
|            | Strong      | 0.977       | 0.915       | 0.923       | 0.810       |
| OR = 2.00  | Weak        | 1.000       | 0.996       | 1.000       | 0.980       |
|            | Moderate    | 1.000       | 0.996       | 1.000       | 0.962       |
|            | Strong      | 1.000       | 0.978       | 0.980       | 0.888       |
| OR = 2.50  | Weak        | 1.000       | 0.999       | 1.000       | 0.992       |
|            | Moderate    | 1.000       | 0.998       | 1.000       | 0.977       |
|            | Strong      | 1.000       | 0.993       | 1.000       | 0.926       |
| OR = 3.00  | Weak        | 1.000       | 0.998       | 1.000       | 0.995       |
|            | Moderate    | 1.000       | 1.000       | 1.000       | 0.985       |
|            | Strong      | 1.000       | 0.996       | 1.000       | 0.937       |

Table S10: Odds ratio estimates for chemical groups and demographic covariates from the Bayesian group index model for subjects with different residence since birth

| Variable                                      | Odds Ratio  | 2.5% CI     | 97.5% CI    |
|-----------------------------------------------|-------------|-------------|-------------|
| PCBs                                          | 1.02        | 0.72        | 1.46        |
| Insecticides                                  | 0.65        | 0.32        | 1.22        |
| Herbicides                                    | 0.89        | 0.55        | 1.45        |
| Metals                                        | 0.74        | 0.50        | 1.12        |
| PAHs                                          | 1.25        | 0.91        | 1.75        |
| Tobacco                                       | 0.90        | 0.68        | 1.15        |
| Child's age                                   | 1.11        | 0.97        | 1.30        |
| Female                                        | 0.97        | 0.59        | 1.58        |
| Child's Ethnicity                             |             |             |             |
| Hispanic vs White Non-Hispanic                | 1.19        | 0.65        | 2.30        |
| Other Non-Hispanic vs White Non-Hispanic      | 1.12        | 0.59        | 2.17        |
| Household Income                              |             |             |             |
| \$15,000 - \$29,999 vs Less than \$15,000     | 0.71        | 0.24        | 1.89        |
| \$30,000 - \$44,999 vs Less than \$15,000     | 0.92        | 0.31        | 2.53        |
| \$45,000 - \$59,999 vs Less than \$15,000     | 0.67        | 0.21        | 1.92        |
| \$60,000 - \$74,999 vs Less than \$15,000     | <b>0.25</b> | <b>0.06</b> | <b>0.90</b> |
| \$75,000 or more vs Less than \$15,000        | 0.42        | 0.14        | 1.15        |
| Mother's education                            |             |             |             |
| High school vs Less than high school          | 0.73        | 0.20        | 2.09        |
| Some college vs Less than high school         | 0.66        | 0.18        | 1.96        |
| Bachelor's or higher vs Less than high school | 0.93        | 0.24        | 2.97        |
| Mother's age                                  | 1.00        | 0.96        | 1.05        |

Figure S1: Forest plot of chemical group effects for childhood leukemia in children who changed residence since birth

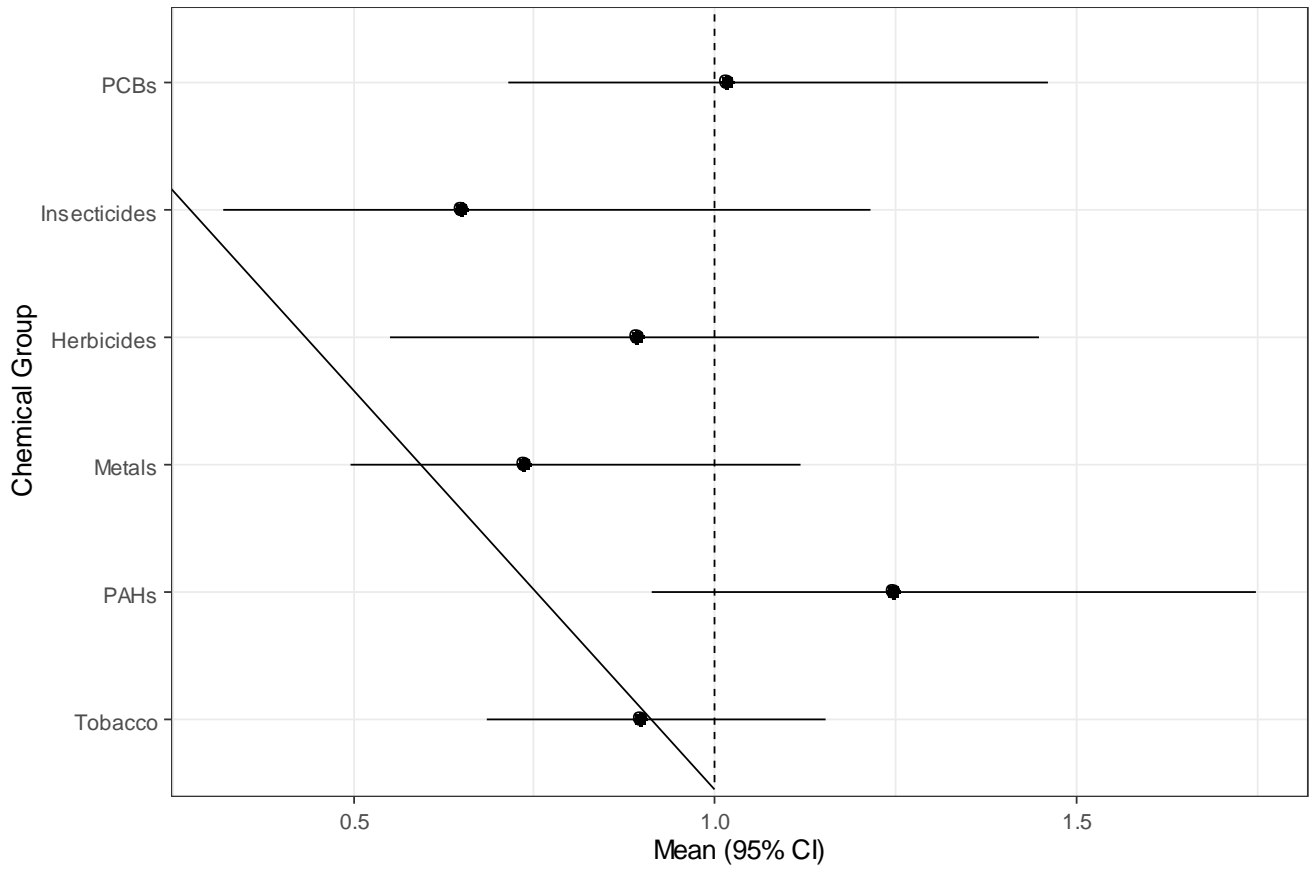

Figure S2: Estimated chemical weights for chemical groups from the Bayesian group index model for childhood leukemia in the CCLS in children who changed residence since birth

Weights for PCBs

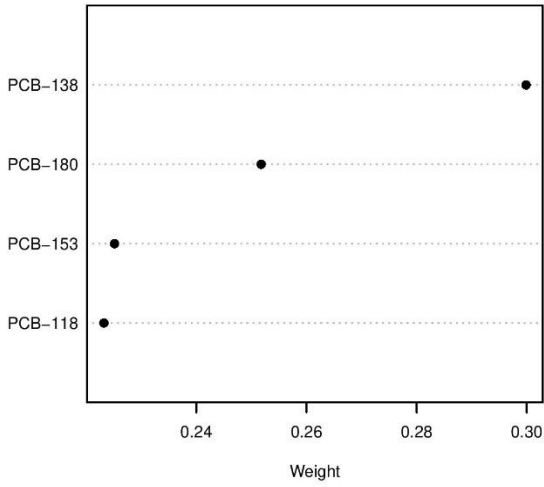

Weights for Insecticides

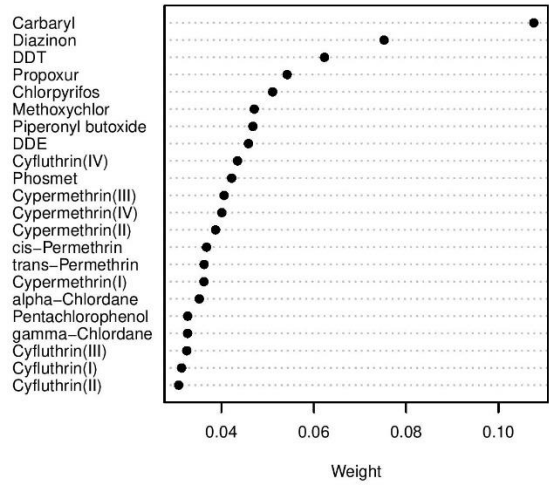

Weights for Herbicides

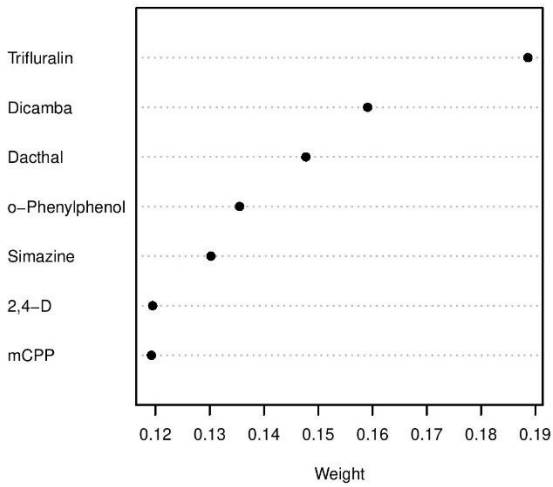

Weights for Metals

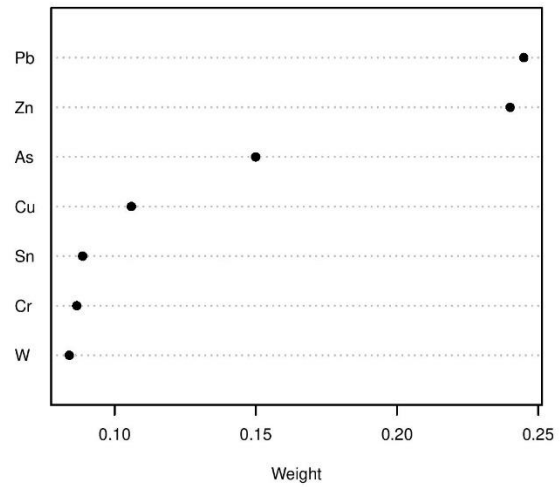

Weights for PAHs

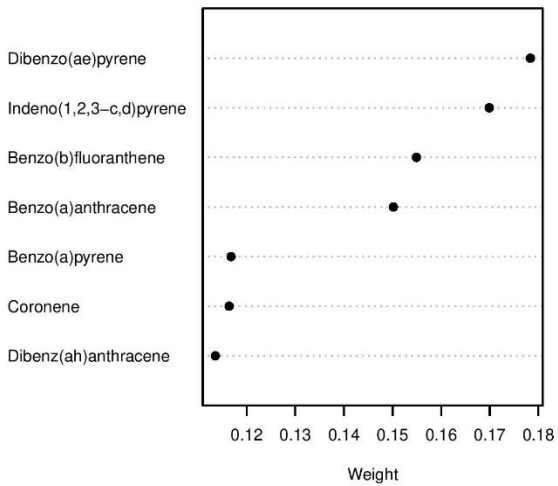

Weights for Tobacco

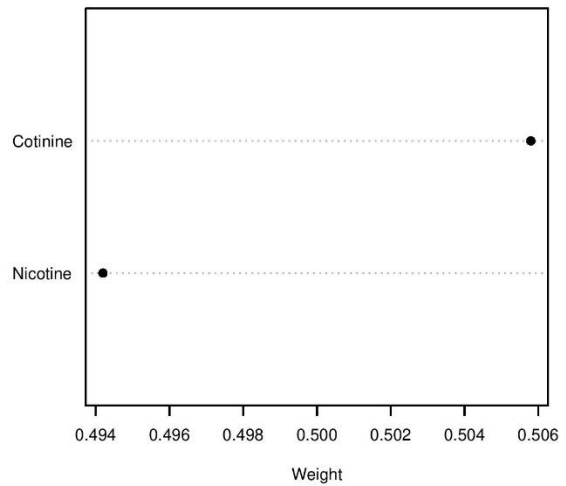

Supplement: ijerph-18-03486-s001.pdf [file ijerph-18-03486-s001.pdf]
